# Supplementary material
Source: publisher site journal article supplement (https://www.spandidos-publications.com/2887/downloadSupplementary)

Figure S1. Transfection efficiency is confirmed in SiHa and HeLa cells by reverse transcription quantitative PCR. miR-1298 mimics promoted miR-1298 expression whereas miR-1298 inhibitors inhibited miR-1298 expression. \*\*\* $P < 0.001$ . miR, microRNA; NC, negative control.

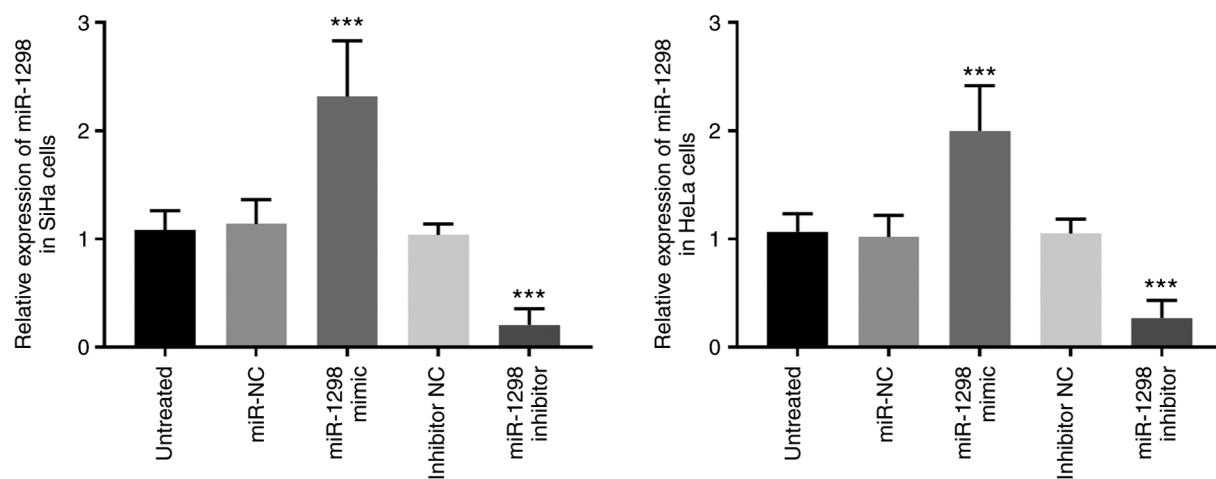

Supplement: Supplementary file 1 [file downloadSupplementary]
